# Supplementary material for: Thiosemicarbazone Copper Chelator BLT-1 Blocks Apicomplexan Parasite Replication by Selective Inhibition of Scavenger Receptor B Type 1 (SR-BI)
Source: MDPI journal article supplement (doi:10.3390/microorganisms9112372), 2021-11-17
Supplement: s1 [file s1]

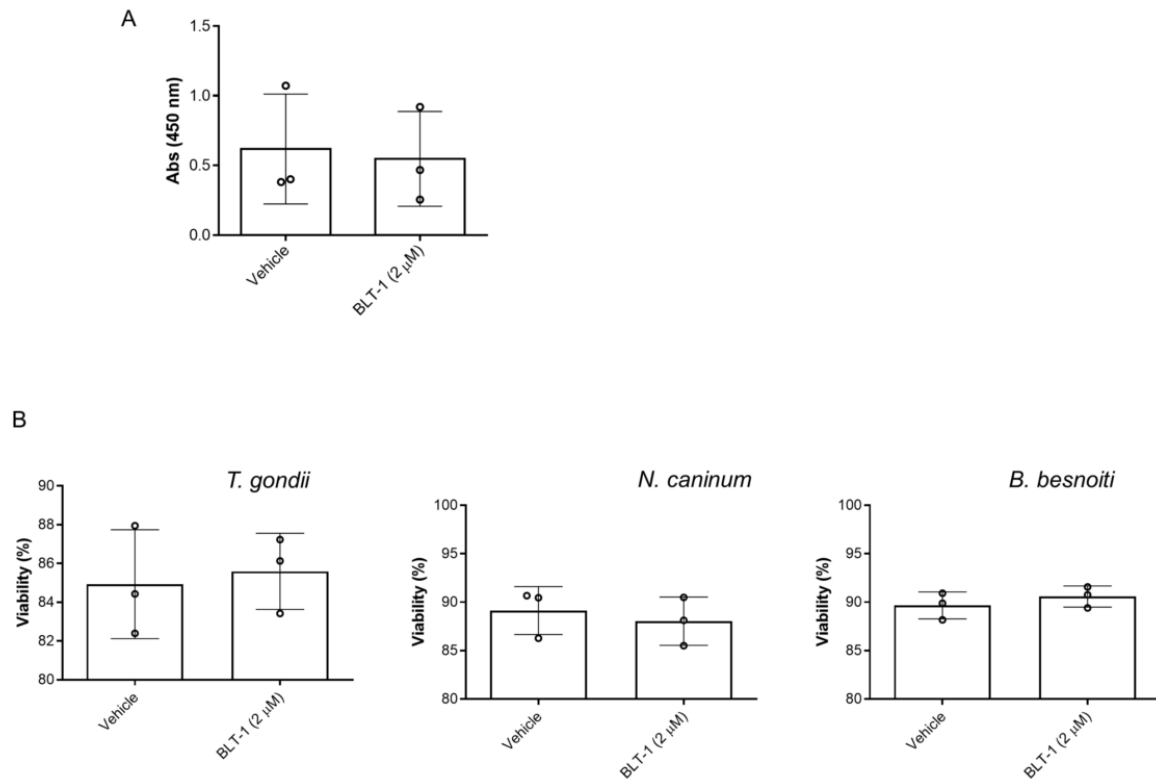

**Figure S1. (A,B)** Viability of BLT-1-treated host cells.

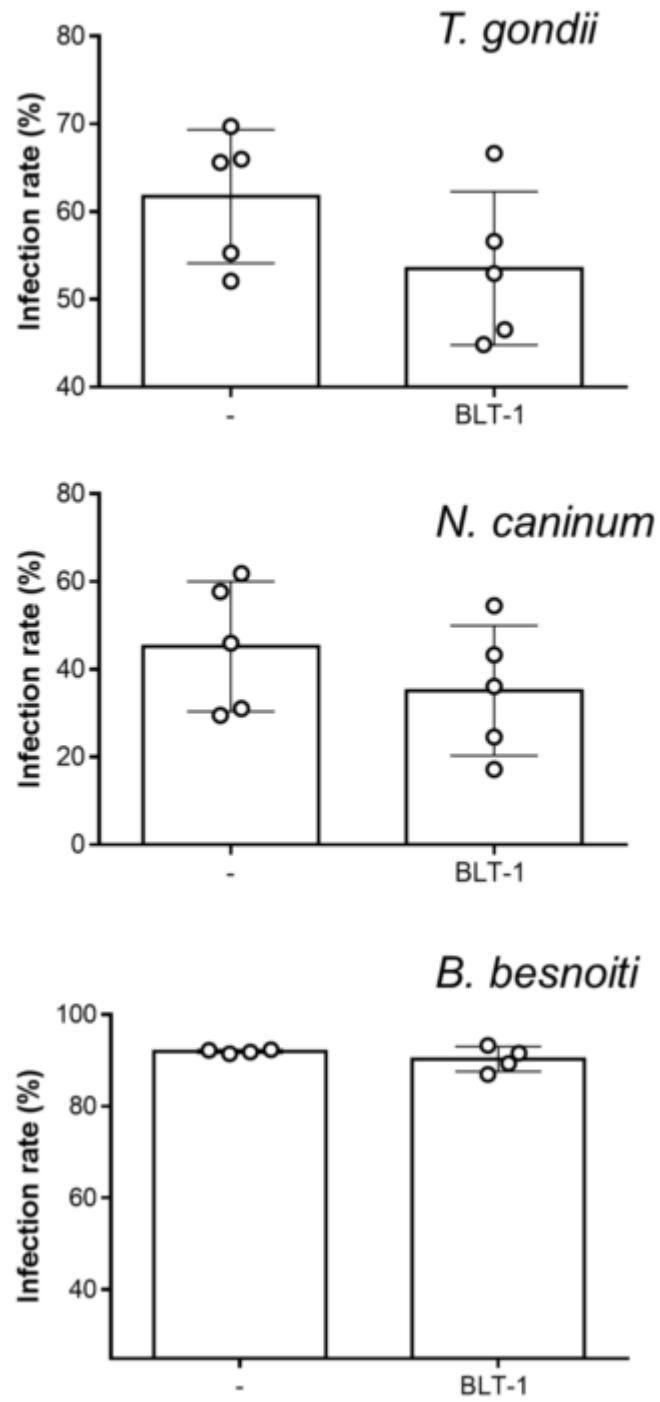

**Figure S2.** Infection rates of fast replicating coccidian parasites after BLT-1 pre-treatment of host cells.
